# Supplementary material for: Reduction in Nitrogen Rate and Improvement of Nitrogen Use Efficiency without Loss of Peanut Yield by Regional Mean Optimal Rate of Chemical Fertilizer Based on a Multi-Site Field Experiment in the North China Plain
Source: MDPI journal article supplement (doi:10.3390/plants12061326), 2023-03-15

**Figure S1.** The yield–fertilizer rate response modeling for the RMOR of NPK fertilizer. In the quadratic equation, y represents pod yield of peanut; x represents N, P, or K fertilizer rates.

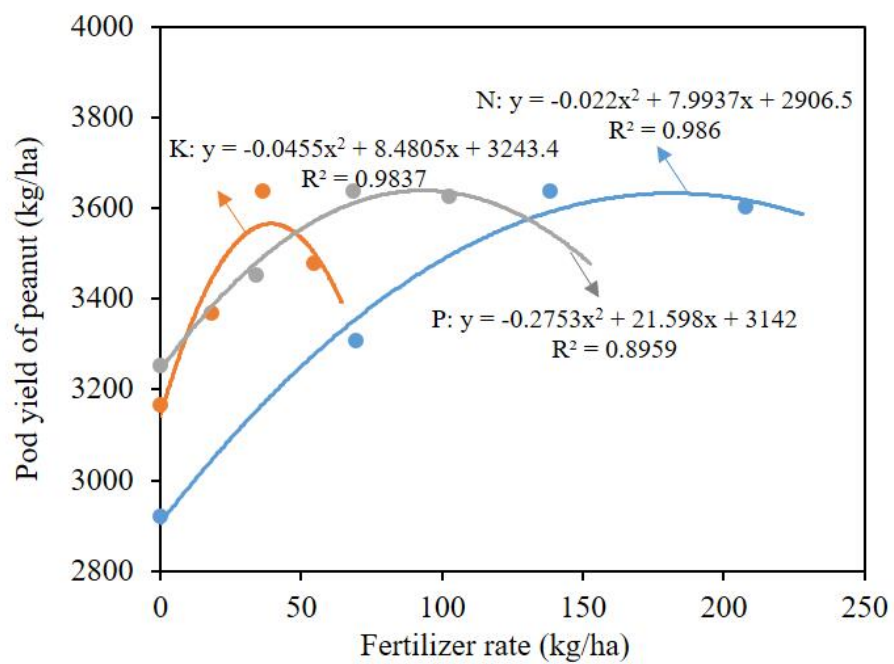

Supplement: s1 [file s1]
